# Supplementary material for: Fluorescent nanoassemblies between tetraphenylethenes and sulfonatocalixarenes: a systematic study of calixarene-induced aggregation
Source: Royal Society of Chemistry journal article supplement (doi:10.1039/c5qo00326a), 2015-11-13
Supplement: c5qo00326a1.pdf [file c5qo00326a1.pdf]

## Supporting Information

for

### **Fluorescent Nanoassemblies between Tetraphenylethenes and Sulfonatocalixarenes: A Systematic Study of Calixarene-Induced Aggregation**

Yan-Cen Liu, Yu-Ying Wang, Han-Wen Tian, Yu Liu,\* Dong-Sheng Guo\*

*Department of Chemistry, State Key Laboratory of Elemento-Organic Chemistry, Collaborative Innovation Center of Chemical Science and Engineering, Nankai University, Tianjin 300071, China. Email: [yuliu@nankai.edu.cn](mailto:yuliu@nankai.edu.cn); [dshguo@nankai.edu.cn](mailto:dshguo@nankai.edu.cn).*

# Table of contents

---

|                                                                                                      |     |
|------------------------------------------------------------------------------------------------------|-----|
| <b>1. Experimental Section</b> .....                                                                 | S-2 |
| <b>1.1 Materials.</b> ....                                                                           | S-2 |
| <b>1.2 Fluorescence spectroscopy</b> .....                                                           | S-2 |
| <b>1.3 Dynamic light scattering (DLS) measurement</b> .....                                          | S-2 |
| <b>2. Syntheses</b> .....                                                                            | S-2 |
| <b>2.1 Synthesis procedure.</b> ....                                                                 | S-2 |
| <b>2.2 <sup>1</sup>H NMR spectra of TQA-TPE and TTA-TPE.</b> ....                                    | S-3 |
| <b>3. The self-assembly of free TQA-TPE</b> .....                                                    | S-4 |
| <b>3.1 The critical aggregation concentration (CAC) of free TQA-TPE<br/>determined by DLS.</b> ..... | S-4 |
| <b>3.2 DLS measurements of free TQA-TPE.</b> .....                                                   | S-5 |
| <b>4. The self-assembly of TQA-TPE in the presence of SC4A</b> .....                                 | S-5 |
| <b>4.1 The CAC of TQA-TPE in the presence of SC4A determined by<br/>DLS.</b> .....                   | S-5 |
| <b>4.2 DLS measurements of TQA-TPE in the presence of SC4A.</b> .....                                | S-6 |
| <b>5. The self-assembly of TQA-TPE in the presence of heparin</b> .....                              | S-7 |
| <b>6. Fluorescence spectra of TTA-TPE in the presence of different<br/>macrocycles</b> .....         | S-7 |
| <b>7. References</b> .....                                                                           | S-8 |

## 1. Experimental Section

### 1.1 Materials.

All chemicals used are reagent grade unless noted. *p*-Sulfonatocalix[*n*]arenes, *n*=4, 5, 6 (SC4A, SC5A, SC6A), *p*-sulfonatocalix[4]arene tetrapropyl ether (SC4A-Pr) were synthesized and purified according to previously reported procedures.<sup>[1,2]</sup> Heparin sodium was purchased from Aladdin Industrial Corporation without further purification. Double quaternary ammonium modified tetraphenylethene (DQA-TPE) and mono quaternary ammonium modified tetraphenylethene (MQA-TPE) were synthesized and purified according to the procedures reported previously.<sup>[3]</sup> All the synthetic compounds were identified using <sup>1</sup>H NMR spectroscopy.

### 1.2 Fluorescence spectroscopy.

Fluorescence spectra were measured in a quartz cell (light path 10 mm) on a Varian Cary Eclipse equipped with a Varian Cary single-cell Peltier accessory to control temperature.

### 1.3 Dynamic light scattering (DLS) measurement.

Solution samples were examined on a laser light scattering spectrometer (BI-200SM) equipped with a digital correlator (TurboCorr) at 636 nm at a scattering angle of 90°. The hydrodynamic diameter (*D<sub>h</sub>*) was determined by DLS experiments at 25 °C.

## 2. Syntheses

### 2.1 Synthesis procedure.

Synthesis of 4,4',4'',4'''-((ethene-1,1,2,2-tetrayltetrakis(benzene-4,1-diyl))tetrakis(oxy))tetrakis(N,N,N-trimethylbutan-1-aminium) (TQA-TPE) (Figure S1)

936 mg (1 mmol) 1,1,2,2-tetrakis(4-(4-bromobutoxy)phenyl)ethane (TPE-Br), 7.2 g (40 mmol) 33% N(CH<sub>3</sub>)<sub>3</sub> aqueous solution, 40 mL ethanol was added to a flask. The mixture was heated at reflux for 10 h and then cooled to room temperature. The solvent was evaporated and the residue was washed by THF, then we obtained 921 mg light yellow powder in a yield of 78.6%. <sup>1</sup>H NMR (400 MHz, D<sub>2</sub>O,  $\delta$ ) (ppm): 6.97 (d, 8H), 6.70 (d, 8H), 3.97 (t, 8H), 3.29 (m, 8H), 3.02 (s, 36H), 1.86 (d, 8H), 1.73 (m, 8H).

Synthesis of 4,4',4'',4'''-((ethene-1,1,2,2-tetrayltetrakis(benzene-4,1-diyl))tetrakis(oxy))tetrakis(N,N-dimethylbutan-1-aminium) (TTA-TPE) (Figure S1)

936 mg (1 mmol) TPE-Br, 6.01 g (40 mmol) 30% NH(CH<sub>3</sub>)<sub>2</sub> ethanol solution, 40 mL

ethanol was added to a flask. The mixture was heated at reflux for 7 h and then cooled to room temperature. The solvent was evaporated and the residue was washed by THF, then we obtained 870 mg light yellow powder in a yield of 78.0%.  $^1\text{H}$  NMR (400 MHz,  $\text{D}_2\text{O}$ ,  $\delta$ ) (ppm): 6.95 (d, 8H), 6.68 (d, 8H), 3.94 (t, 8H), 3.09 (m, 8H), 2.77 (s, 24H), 1.73 (m, 16H).

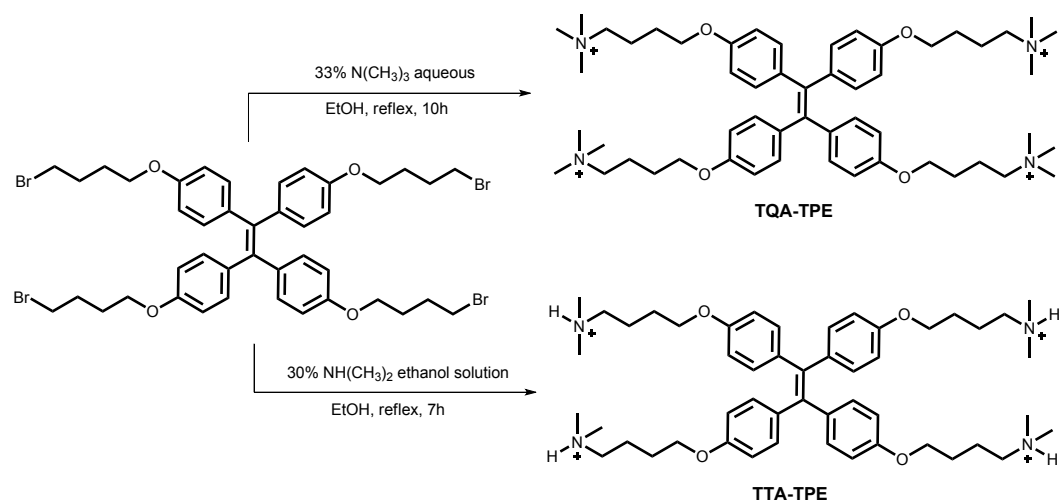

**Figure S1.** Synthetic routes of TQA-TPE and TTA-TPE.

## 2.2 $^1\text{H}$ NMR spectra of TQA-TPE and TTA-TPE.

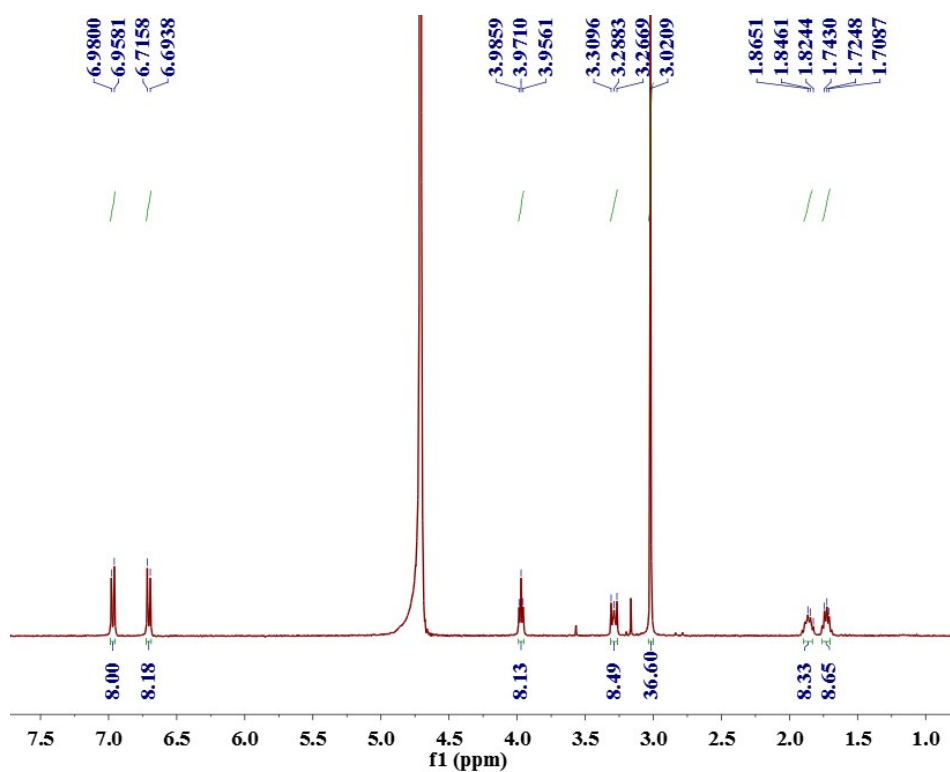

**Figure S2.**  $^1\text{H}$  NMR spectrum of TQA-TPE in  $\text{D}_2\text{O}$ .

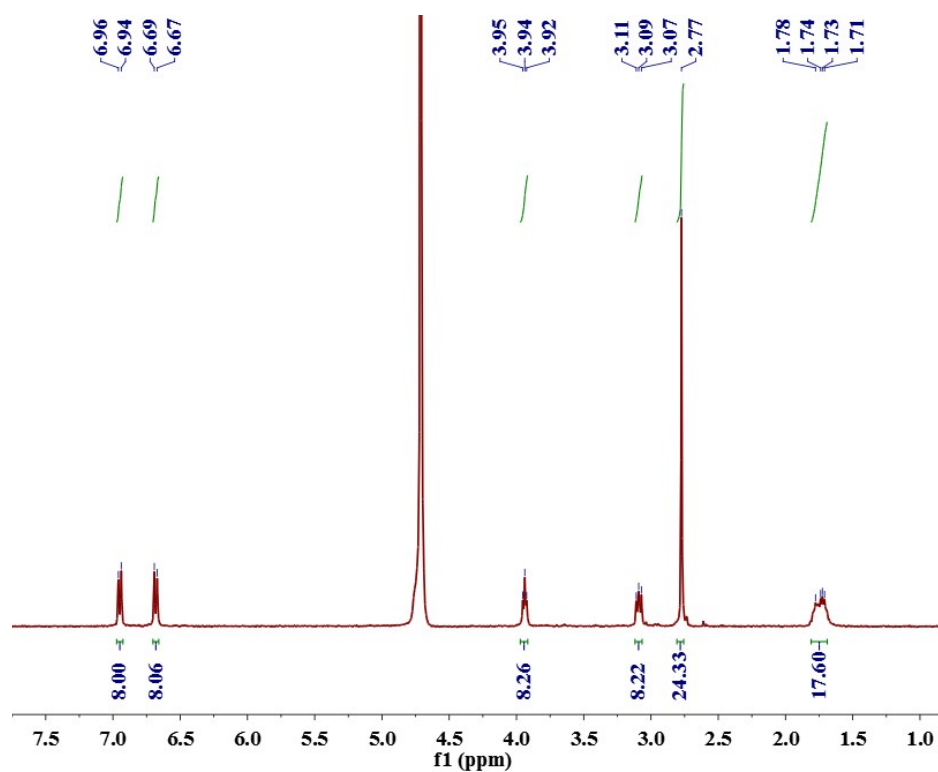

**Figure S3.**  $^1\text{H}$  NMR spectrum of TTA-TPE in  $\text{D}_2\text{O}$ .

### 3. The self-assembly of free TQA-TPE

#### 3.1 The critical aggregation concentration (CAC) of free TQA-TPE determined by DLS.

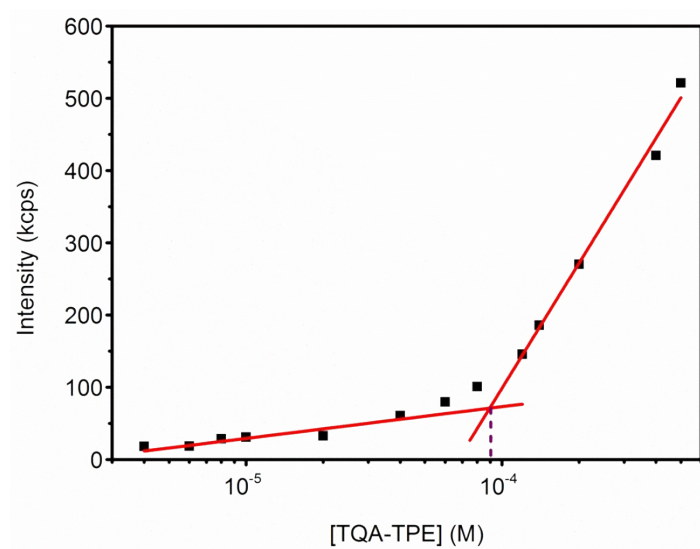

**Figure S4.** Dependence of light scattering intensity on the TQA-TPE concentration in water at  $25^\circ\text{C}$ .

### 3.2 DLS measurements of free TQA-TPE.

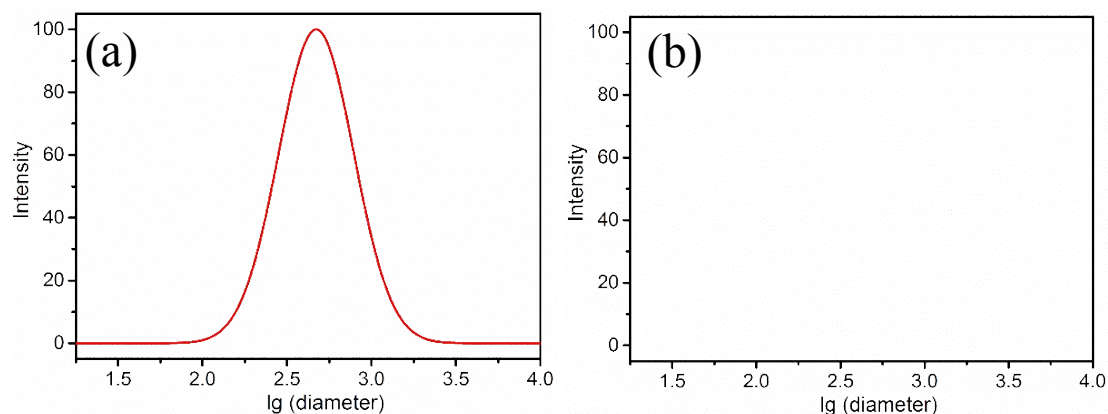

**Figure S5.** DLS measurements of free TQA-TPE at (a)  $1.2 \times 10^{-4}$  M and (b)  $1.0 \times 10^{-5}$  M.

## 4. The self-assembly of TQA-TPE in the presence of SC4A

### 4.1 The CAC of TQA-TPE in the presence of SC4A determined by DLS.

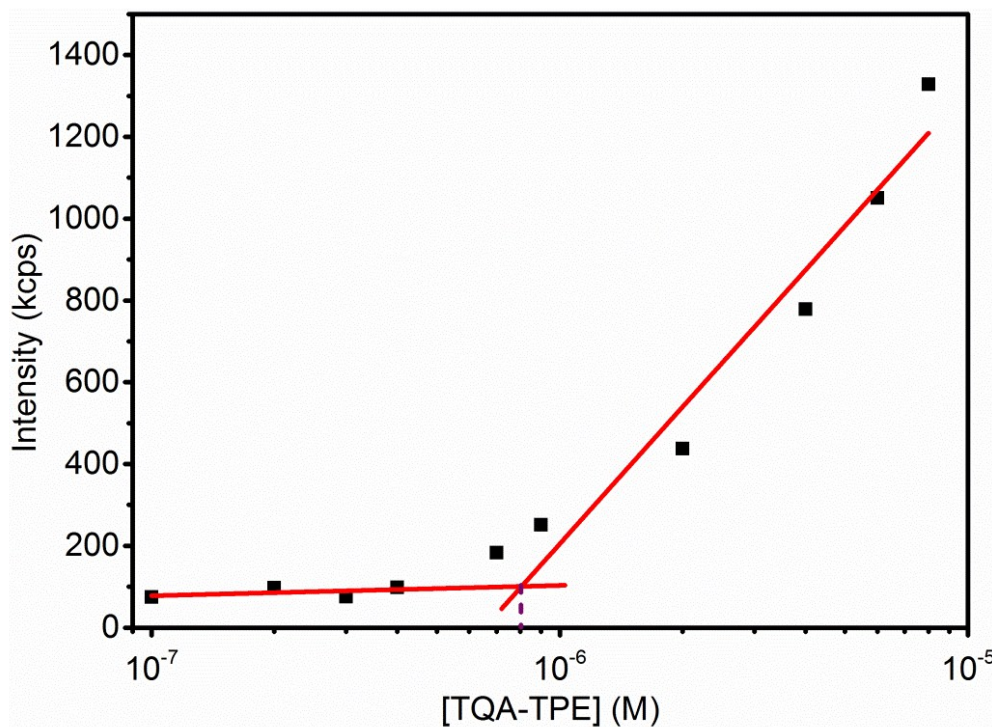

**Figure S6.** Dependence of light scattering intensity on the TQA-TPE concentration with SC4A at a 1:1 charge stoichiometry in water at 25 °C.

## 4.2 DLS measurements of TQA-TPE in the presence of SC4A.

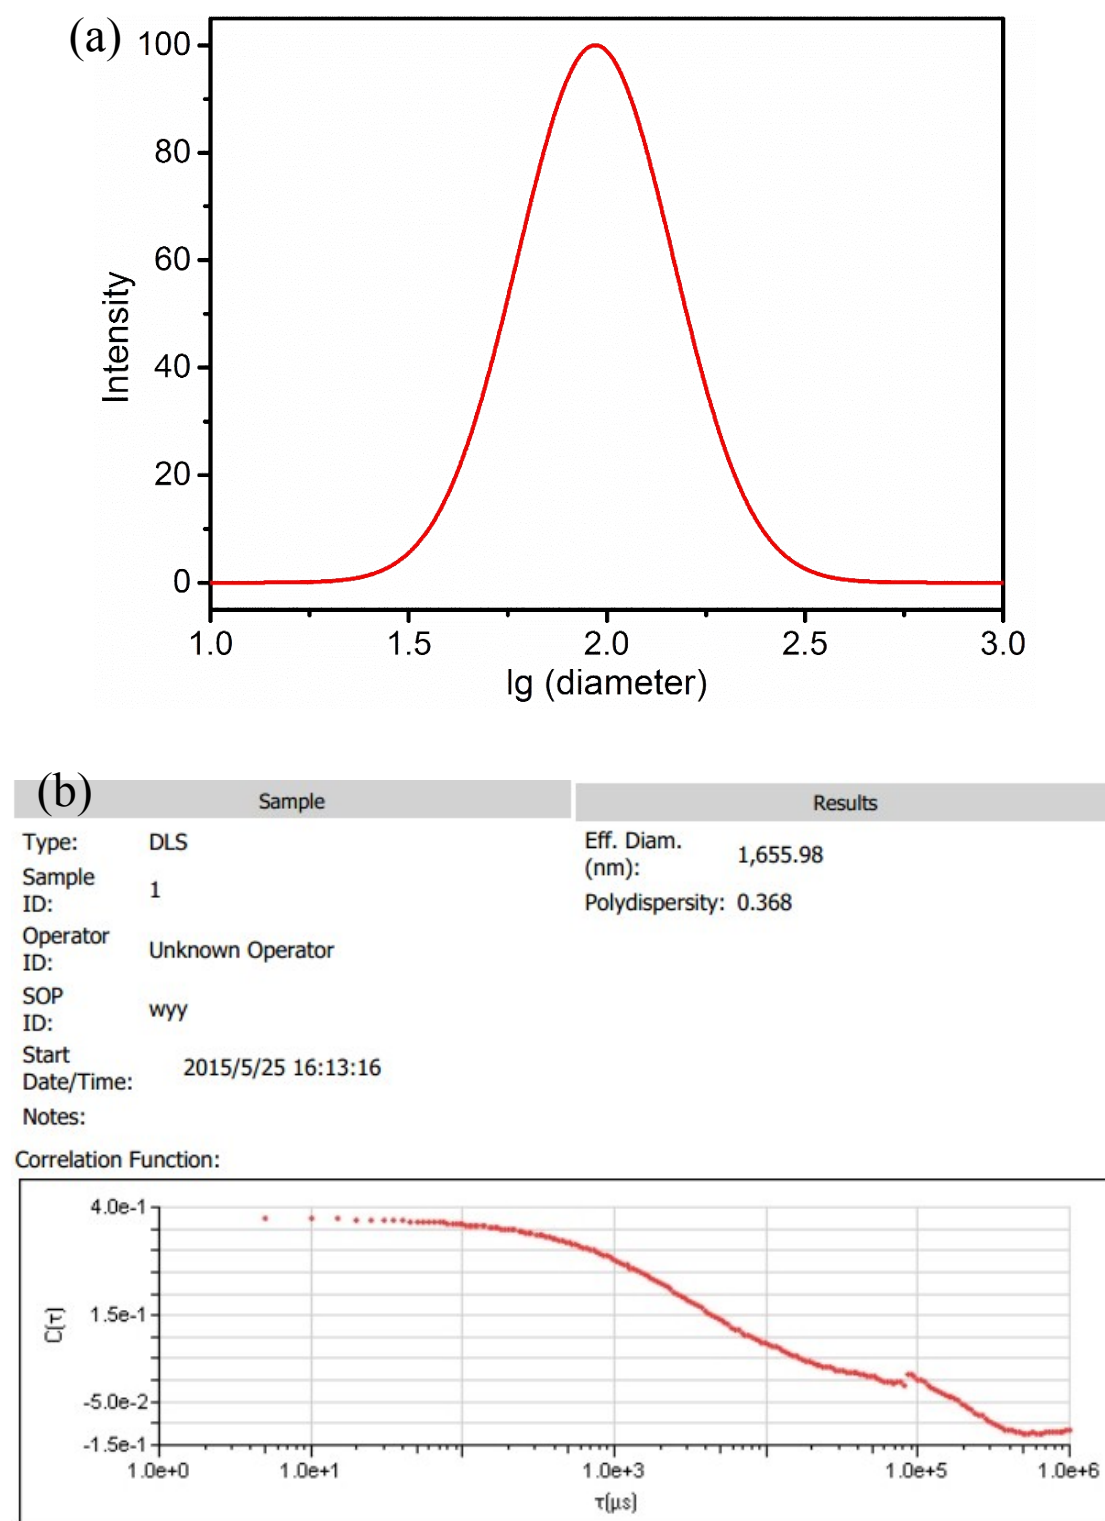

**Figure S7.** DLS measurements of TQA-TPE ( $1.0 \times 10^{-5}$  M) with SC4A (a) at a 1:1 charge stoichiometry, (b) at a 1:9 charge stoichiometry, the disconnected correlation function indicates no credible signal appears.



## 5. The self-assembly of TQA-TPE in the presence of heparin

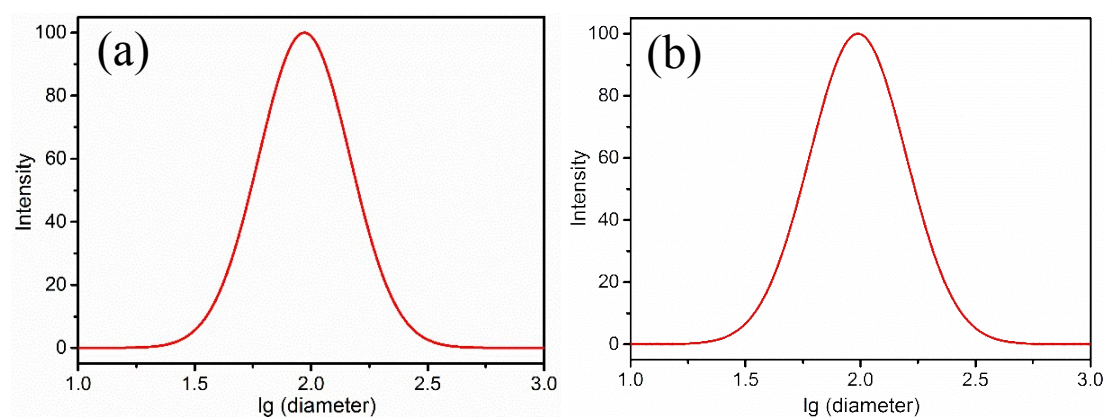

**Figure S8.** DLS measurements TQA-TPE ( $1.0 \times 10^{-5}$  M) with heparin (a) at a 1:1 charge stoichiometry and (b) at a 1:9 charge stoichiometry.

## 6. Fluorescence spectra of TTA-TPE in the presence of different macrocycles

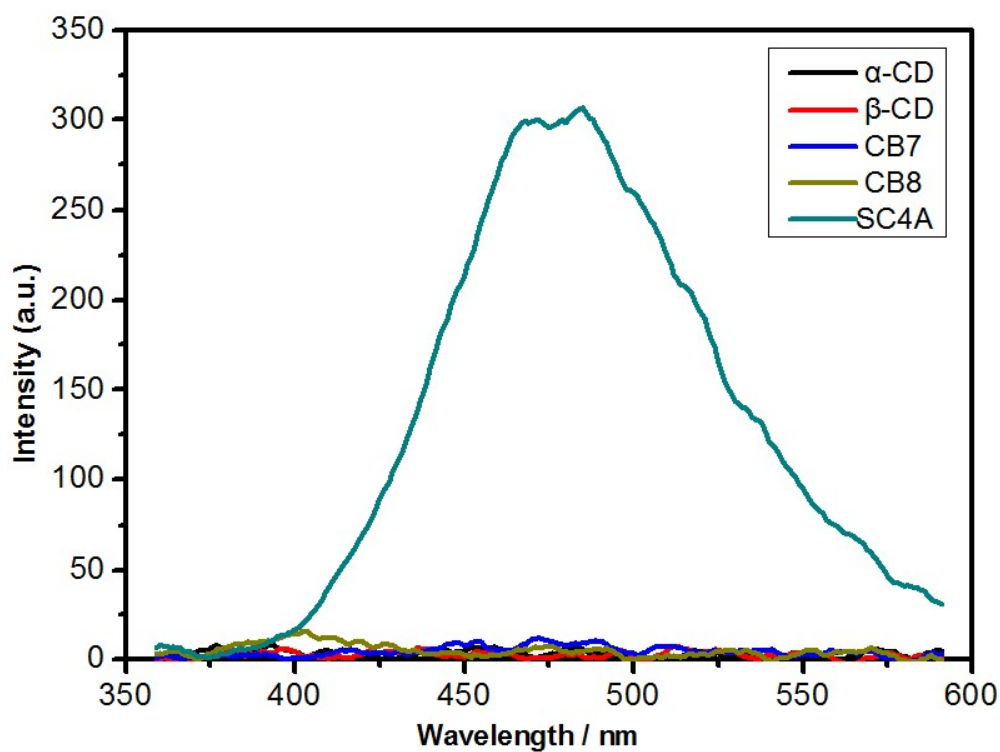

**Figure S9.** Fluorescence spectra of TTA-TPE ( $1.0 \times 10^{-5}$  M) in the presence of  $\alpha$ -CD ( $4.0 \times 10^{-5}$  M),  $\beta$ -CD ( $4.0 \times 10^{-5}$  M), CB7 ( $4.0 \times 10^{-5}$  M), CB8 ( $4.0 \times 10^{-5}$  M), SC4A ( $1.0 \times 10^{-5}$  M) in water at 25 °C,  $\lambda_{\text{ex}} = 320$  nm.



## 7. References

---

- <sup>1</sup> S. Shinkai, S. Mori, H. Koreishi, T. Tsubaki and O. Manabe, *J. Am. Chem. Soc.*, 1986, **108**, 2409.
- <sup>2</sup> G. Arena, A. Contino, G. Lombardo and D. Sciotto, *Thermochim. Acta*, 1995, **264**, 1.
- <sup>3</sup> B.-P. Jiang, D.-S. Guo, Y.-C. Liu, K.-P. Wang and Y. Liu, *ACS Nano*, 2014, **8**, 1609.
